# Supplementary material for: Role of precipitants in transition of acute decompensation to acute-on-chronic liver failure in patients with HBV-related cirrhosis
Source: PubMed Central journal article supplement — JHEP Rep. 2022 Jul 5;4(10):100529. doi: 10.1016/j.jhepr.2022.100529 (PMC9424579; doi:10.1016/j.jhepr.2022.100529), 2022-07-05
Supplement: mmc1.pdf [file mmc1.pdf]

# **Role of precipitants in transition of acute decompensation to acute-on-chronic liver failure in patients with HBV-related cirrhosis**

Tongyu Wang, Wenting Tan, Xianbo Wang, Xin Zheng, Yan Huang, Beilin Li, Zhongji Meng, Yanhang Gao, Zhiping Qian, Feng Liu, Xiaobo Lu, Huadong Yan, Yubao Zheng, Weituo Zhang, Shan Yin, Wenyi Gu, Yan Zhang, Fuchen Dong, Jianyi Wei, Guohong Deng, Xiaomei Xiang, Yi Zhou, Yixin Hou, Qun Zhang, Shue Xiong, Jing Liu, Liyuan Long, Ruochan Chen, Jinjun Chen, Xiuhua Jiang, Sen Luo, Yuanyuan Chen, Chang Jiang, Jinming Zhao, Liujuan Ji, Xue Mei, Jing Li, Tao Li, Rongjiong Zheng, Xinyi Zhou, Haotang Ren, Yu Shi, Hai Li, Chinese (Acute on) Chronic Liver Failure Consortium

(Ch-CLIF.C)

Table of contents

|                                          |    |
|------------------------------------------|----|
| Supplementary materials and methods..... | 2  |
| Supplementary tables.....                | 7  |
| Supplementary figures.....               | 23 |
| Supplementary references.....            | 28 |

## **Supplementary materials and methods**

### **Definition**

#### **The diagnosis criteria for ACLF**

ACLF was diagnosed following the European Association for the Study of the Liver (EASL) consortium definition. <sup>[1]</sup> Accordingly, ACLF grade 1 (ACLF-1) was defined by single kidney failure (serum creatinine  $\geq 2$  mg/dL) or single cerebral failure (grade III-IV HE for brain based on West Haven criteria) with renal dysfunction (serum creatinine ranging from 1.5 to 1.9 mg/dL) or other single organ failure (serum bilirubin  $\geq 12$  mg/dL for liver; INR [international normalized ratio]  $\geq 2.5$  for coagulation; vasopressors to maintain arterial pressure for circulation; PaO<sub>2</sub>/FiO<sub>2</sub>  $\leq 200$  or SpO<sub>2</sub>/FiO<sub>2</sub>  $\leq 214$  for respiration) with renal dysfunction and/or grade I-II HE. ACLF grade 2 (ACLF-2) and ACLF grade 3 (ACLF-3) were defined by the presence of 2 or no less than 3 organ failures, respectively.

#### **The diagnosis criteria of bacterial infections of different types**

- (1) Pneumonia: radiological evidence of new pulmonary infiltrate with one of the following: (a) any respiratory symptoms (such as cough, sputum, dyspnea, or pleuritic pain), (b) any findings on auscultation (rales or crepitation) or fever/chills/shivering, or white blood cell (WBC) count  $>10,000/\text{mm}^3$  or  $<4,000/\text{mm}^3$ ;
- (2) Spontaneous bacterial peritonitis (SBP): ascitic fluid polymorphonuclear (PMN) cells  $>250/\text{mL}$ , with or without positive ascites culture<sup>[2]</sup>;
- (3) Bacteremia: positive blood cultures with or without a source of infection;
- (4) Urinary tract infection: urine WBC  $>15/\text{high power field (HPF)}$  with positive culture and symptom of urinary irritation;
- (5) Skin infection: fever and leukocytosis with cellulitis;

(6) other bacterial infections, including infection of biliary tract, liver abscess, testicular infection, purulent meningitis, intra-abdominal infection, and other clear infection sites.

## Study setting and locations

Names and locations of centers (tertiary hospitals) in the derivation and validation cohorts<sup>[3, 4]</sup>:

1. Ren Ji Hospital, School of Medicine, Shanghai, Jiao Tong University, Shanghai, China;
2. Beijing Ditan Hospital, Capital Medical University, Beijing, China
3. Southwest Hospital, Third Military Medical University (Army Medical University), Chongqing, China
4. Union Hospital, Tongji Medical College, Huazhong University of Science and Technology, Wuhan, China
5. Xiangya Hospital, Central South University, Changsha, China
6. Nanfang Hospital, Southern Medical University, Guangzhou, China
7. Taihe Hospital, Hubei University of Medicine, Shiyan, China
8. Shanghai Public Health Clinical Centre, Fudan University, Shanghai, China
9. The Second Hospital of Shandong University, Jinan, China
10. The First Affiliated Hospital of Xinjiang Medical University, Urumqi, China
11. Henan Provincial People's Hospital, Zhengzhou, China
12. The First Hospital of Jilin University, Changchun, China
13. The First Affiliated Hospital of School of Medicine, Zhejiang University, Hangzhou, China
14. Fuzhou General Hospital of Nanjing Military Command, Fujian, China
15. Affiliated Hospital of Logistics University of People's Armed Police Force, Tianjin, China

No.1-12,14,15 centers participated in the derivation cohort, No.1-13 centers participated in the validation cohort in the Chinese Acute-on-Chronic Liver Failure (CATCH-LIFE) study.

## **The management of patients**

In the study, each patients received standard therapies targeting at etiology, precipitants or complications.

Patients with detectable HBV DNA immediately started a long course of nucleoside analogs treatment (entecavir 0.5 mg/day or tenofovir 300 mg/day). Patients with active alcohol assumption were required to abstain alcohol. Patients who were considered with drug induced liver injury (DILI) were required to stop using the suspicious hepatotoxic drugs. Standard etiological treatments of other causes of CLDs in the study, including HCV, NAFLD, autoimmune liver diseases, Wilson disease, et cetera, were given to each relevant patient as suggested.

The management of decompensation complications were as follow: 1) Diagnostic abdominocentesis were performed in patients with ascites. Patients with uncomplicated moderate ascites were treated with aldosterone antagonist and/or furosemide. For those with large or refractory ascites, paracentesis combining with intravenous albumin, or tolvaptan, was used. For patients complicated with spontaneous bacterial peritonitis (SBP), an empirical antibiotic therapy, mainly 3rd generation cephalosporin,  $\beta$ -lactam/ $\beta$ -lactamase inhibitors or Carbapenem, with intravenous albumin, was initiated immediately. For patients complicated with acute kidney injury (AKI), potential causes were investigated and removed or corrected as possible. And terlipressin plus albumin was used for HRS-AKI; 2) patients with acute gastrointestinal bleeding were treated with somatostatin, proton pump inhibitors (PPI) and antibiotic prophylaxis and endoscopy was performed as early as possible. For those with uncontrolled hemorrhage, an urgent therapeutic endoscopy, Sengstaken-Blackmore tube or TIPS was performed; 3) patients with hepatic encephalopathy were treated with oral lactulose and intravenous L-ornithine aspartate, and

potential causes were investigated and removed or corrected as possible; 4) patients with bacterial infections other than SBP received empirical antibiotic therapies. Organ supporting, including mechanical ventilation, volume replacement and/or use of vasoactive agents, or renal replacement, was performed for patients with organ failure. Extracorporeal liver supporting was selectively used for patients with liver failure (defined as TB > 10 mg/dL and INR >1.5), brain failure (HE over III grade) or renal failure<sup>[5]</sup>.

Generally, a standard for recommendation for liver transplantation was proposed for the study: 1) patients with decompensated cirrhosis and recurrent or uncontrolled complications following standard therapies, for instance, refractory ascites, recurrent variceal hemorrhage, and with a MELD Score >15; or 2) patients with acute-on-chronic liver failure (ACLF) who were unresponsive to standard therapies, and often with extracorporeal liver supporting. The priority of patients in the waiting list of liver transplantation was determined by MELD-Na score.<sup>[6, 7]</sup>

Moreover, patients with at least 3 organ failures but without circulation or lung failure were given higher priority in the waiting list of liver transplantation.

## Supplementary tables

**Table S1. Bacterial infection types in patients with ACLF at enrollment, ACLF development and no ACLF development patients.**

| <b>Identified bacterial infection types</b> | <b>ACLF<br/>(n= 308)</b> | <b>Pre-ACLF<br/>(n= 137)</b> | <b>UDC<br/>(n= 380)</b> | <b>SDC<br/>(n= 728)</b> | <b>P value</b> |
|---------------------------------------------|--------------------------|------------------------------|-------------------------|-------------------------|----------------|
| Pneumonia                                   | 35 (11.4)                | 15 (10.9)                    | 18 (4.7)                | 40 (5.5)                | <0.001         |
| Urinary tract infection                     | 1 (0.3)                  | 0 (0.0)                      | 1 (0.3)                 | 3 (0.4)                 | 0.881          |
| Spontaneous bacterial peritonitis           | 30 (9.7)                 | 10 (7.3)                     | 16 (4.2)                | 32 (4.4)                | 0.003          |
| Bacteremia                                  | 9 (2.9)                  | 5 (3.6)                      | 3 (0.8)                 | 6 (0.8)                 | 0.007          |
| Cellulitis                                  | 0 (0.0)                  | 0 (0.0)                      | 2 (0.5)                 | 1 (0.1)                 | 0.367          |
| Other infections                            | 7 (2.3)                  | 1 (0.7)                      | 4 (1.1)                 | 12 (1.6)                | 0.507          |

Note: Other infections: including infection of biliary tract, liver abscess, testicular infection, purulent meningitis, intra-abdominal infection, and other clear infection sites.

**Table S2. Comparison of laboratory indicators and severity scores in pre-ACLF patients at enrollment and at development time point.**

|                                       | Pre-ACLF (n = 94)       |                         | p value |
|---------------------------------------|-------------------------|-------------------------|---------|
|                                       | At Enrollment           | At ACLF development     |         |
| <b>Laboratory data, median (IQRs)</b> |                         |                         |         |
| TB (mg/dL)                            | 19.36 [9.46, 27.39]     | 20.76 [13.49, 29.71]    | 0.107   |
| INR                                   | 2.01 [1.73, 2.28]       | 2.55 [1.89, 2.75]       | <0.001  |
| Cr (mg/dL)                            | 0.79 [0.68, 1.01]       | 0.90 [0.70, 1.20]       | 0.015   |
| BUN (mEq/L)                           | 4.90 [3.51, 6.90]       | 5.40 [3.68, 9.17]       | 0.108   |
| Albumin (g/L)                         | 30.40 [27.70, 34.09]    | 31.59 [29.10, 34.71]    | 0.036   |
| Hemoglobin (g/L)                      | 119.00 [99.00, 133.00]  | 104.00 [85.00, 120.50]  | <0.001  |
| WBC (10 <sup>9</sup> /L)              | 6.02 [4.50, 8.01]       | 6.10 [4.05, 8.47]       | 0.984   |
| PLT (10 <sup>9</sup> /L)              | 79.00 [54.00, 108.00]   | 65.50 [39.75, 92.75]    | 0.005   |
| Sodium (mEq/L)                        | 136.50 [132.90, 139.50] | 135.40 [132.00, 138.55] | 0.171   |
| AST/ALT                               | 1.15 [0.83, 1.59]       | 1.43 [1.07, 2.11]       | 0.001   |
| Prealbumin, mg/L                      | 41.65 [20.75, 59.00]    | 33.73 [1.54, 46.75]     | 0.013   |
| Procalcitonin (ng/ml)                 | 0.75 [0.43, 1.23]       | 0.77 [0.54, 1.15]       | 0.443   |
| <b>Liver function, mean (SD)</b>      |                         |                         |         |
| MELD                                  | 25.00 [22.00, 27.00]    | 29.00 [26.00, 31.00]    | <0.001  |
| MELD-sodium                           | 26.00 [24.00, 30.00]    | 31.00 [27.00, 34.50]    | <0.001  |
| CLIF-C AD                             | 53.54 [47.83, 58.50]    | 58.50 [51.61, 65.65]    | <0.001  |
| CLIF-C ACLF                           | 38.90 [35.38, 42.12]    | 44.27 [38.97, 49.02]    | <0.001  |

Statistical analysis was performed by a paired Student t test.



**Table S3. Association between precipitation events and ACLF development during hospitalization in HBV related cirrhotic patients with acutely decompensation.**

| Precipitation events, n (%)                          | ACLF development<br>(N= 94) | No ACLF<br>development<br>(N= 876) | p value |
|------------------------------------------------------|-----------------------------|------------------------------------|---------|
| <b>Intra-hepatic</b>                                 |                             |                                    |         |
| Hepatitis B flare with HBV reactivation              | 18 (19.1)                   | 37 (4.2)                           | <0.001  |
| Spontaneous hepatitis B flare with high HBV-DNA load | 13 (13.9)                   | 48 (5.5)                           | 0.003   |
| Spontaneous hepatitis B flare with low HBV-DNA load  | 14 (14.9)                   | 74 (8.5)                           | 0.062   |
| No hepatitis B flare with HBV reactivation           | 10 (10.6)                   | 77 (8.9)                           | 0.426   |
| No hepatitis B flare with high HBV load              | 6 (6.4)                     | 71 (8.8)                           | 0.400   |
| No hepatitis B flare with low HBV load               | 19 (20.2)                   | 285 (32.5)                         | <0.001  |
| <b>Extra-hepatic</b>                                 |                             |                                    |         |
| Superimposed infection on HBV                        | 7 (7.4)                     | 20 (2.3)                           | 0.010   |
| Hepatotoxic drugs                                    | 8 (8.5)                     | 35 (4.0)                           | 0.079   |
| Active alcohol intaking                              | 5 (5.3)                     | 39 (4.5)                           | 0.902   |
| Bacterial infection                                  | 54 (57.4)                   | 208 (23.7)                         | <0.001  |
| Variceal bleeding                                    | 8 (8.5)                     | 179 (20.4)                         | 0.008   |
| Portal vein thrombosis                               | 5 (5.3)                     | 78 (8.9)                           | 0.324   |
| Surgery                                              | 2 (2.1)                     | 15 (1.7)                           | 1.000   |

**Table S4. Prevalence of precipitant events in different ACLF grade at enrollment**

| <b>Precipitants, n (%)</b>                           | <b>Grade 1<br/>(n= 43)</b> | <b>Grade 2<br/>(n= 135)</b> | <b>Grade 3<br/>(n= 19)</b> | <b>P value</b> |
|------------------------------------------------------|----------------------------|-----------------------------|----------------------------|----------------|
| Hepatitis B flare with HBV reactivation              | 2 (4.7)                    | 18 (13.3)                   | 2 (10.5)                   | 0.288          |
| Spontaneous hepatitis B flare with high HBV-DNA load | 4 (9.3)                    | 18 (13.3)                   | 1 (5.3)                    | 0.509          |
| Superimposed infection on HBV                        | 3 (7.0)                    | 12 (8.9)                    | 1 (5.3)                    | 0.823          |
| Hepatotoxic drugs                                    | 2 (4.7)                    | 8 (5.9)                     | 0 (0.0)                    | 0.539          |
| Active alcohol intaking                              | 1 (2.3)                    | 13 (9.6)                    | 1 (5.3)                    | 0.267          |
| Bacterial infection                                  | 21 (48.8)                  | 67 (49.6)                   | 8 (42.1)                   | 0.828          |
| Variceal bleeding                                    | 5 (11.6)                   | 4 (3.0)                     | 1 (5.3)                    | 0.079          |
| Portal vein thrombosis                               | 1 (2.3)                    | 2 (1.5)                     | 0 (0.0)                    | 0.787          |
| Surgery                                              | 0 (0.0)                    | 1 (0.5)                     | 0 (0.0)                    | 0.777          |

**Table S5. Prevalence of precipitant events in liver, coagulation and extra-hepatic organ failure of ACLF at enrollment**

| <b>Precipitants, n (%)</b>                           | <b>Liver failure<br/>(n= 177)</b> | <b>Coagulation<br/>(n= 139)</b> | <b>Both*<br/>(n= 133)</b> | <b>Extra-hepatic<br/>organ failure<br/>(n= 53)</b> |
|------------------------------------------------------|-----------------------------------|---------------------------------|---------------------------|----------------------------------------------------|
| Hepatitis B flare with HBV reactivation              | 22 (12.4)                         | 15 (10.8)                       | 15 (11.3)                 | 6 (11.3)                                           |
| Spontaneous hepatitis B flare with high HBV-DNA load | 22 (12.4)                         | 19 (13.7)                       | 18 (13.5)                 | 2 (3.8)                                            |
| Superimposed infection on HBV                        | 16 (9.0)                          | 12 (8.6)                        | 12 (9.0)                  | 3 (5.7)                                            |
| Hepatotoxic drugs                                    | 10 (5.6)                          | 6 (4.3)                         | 6 (4.5)                   | 2 (3.8)                                            |
| Active alcohol intaking                              | 15 (8.5)                          | 12 (8.6)                        | 12 (9.0)                  | 3 (5.7)                                            |
| Bacterial infection                                  | 87 (49.2)                         | 65 (46.8)                       | 63 (47.4)                 | 27 (50.9)                                          |
| Variceal bleeding                                    | 5 (2.8)                           | 4 (2.9)                         | 3 (2.3)                   | 7 (13.2)                                           |
| Portal vein thrombosis                               | 2 (1.1)                           | 2 (1.4)                         | 1 (0.8)                   | 1 (1.9)                                            |
| Surgery                                              | 1 (0.4)                           | 0 (0.0)                         | 0 (0.0)                   | 0 (0.0)                                            |

\*Both liver and coagulation failure.

**Table S6. Prevalence of precipitant events in changed ACLF grades at day 4 and day 7**

|                                                      | Day4              |                   |                   |                   | P value | Day7               |                   |                   |                   | P value |
|------------------------------------------------------|-------------------|-------------------|-------------------|-------------------|---------|--------------------|-------------------|-------------------|-------------------|---------|
|                                                      | Grade0<br>(n= 45) | Grade1<br>(n= 30) | Grade2<br>(n= 87) | Grade3<br>(n= 23) |         | Grade 0<br>(n= 55) | Grade1<br>(n= 24) | Grade2<br>(n= 76) | Grade3<br>(n= 22) |         |
| <b>ACLF grade at enrollment</b>                      |                   |                   |                   |                   | <0.001  |                    |                   |                   |                   | <0.001  |
| Grade 1                                              | 18<br>(40.0)      | 20<br>(66.7)      | 4 (4.6)           | 0 (0.0)           |         | 19 (34.5)          | 16<br>(66.7)      | 4 (5.3)           | 2 (9.1)           |         |
| Grade 2                                              | 23<br>(51.1)      | 10<br>(33.3)      | 79 (90.8)         | 14<br>(60.9)      |         | 30 (54.5)          | 8<br>(33.3)       | 68 (89.5)         | 16 (72.7)         |         |
| Grade 3                                              | 4 (8.9)           | 0 (0.0)           | 4 (4.6)           | 9<br>(39.1)       |         | 6 (10.9)           | 0 (0.0)           | 4 (5.3)           | 4 (18.2)          |         |
| <b>Precipitant events</b>                            |                   |                   |                   |                   |         |                    |                   |                   |                   |         |
| Hepatitis B flare with HBV reactivation              | 3 (6.7)           | 4<br>(13.3)       | 11 (12.6)         | 2 (8.7)           | 0.703   | 5 (9.1)            | 2 (8.3)           | 11 (14.5)         | 1 (4.5)           | 0.515   |
| Spontaneous hepatitis B flare with high HBV-DNA load | 1 (2.2)           | 5<br>(16.7)       | 13 (14.9)         | 4<br>(17.4)       | 0.12    | 5 (9.1)            | 4<br>(16.7)       | 12 (15.8)         | 2 (9.1)           | 0.604   |
| Superimposed infection on HBV                        | 4 (8.9)           | 2 (6.7)           | 8 (9.2)           | 2 (8.7)           | 0.98    | 7 (12.7)           | 2 (8.3)           | 5 (6.6)           | 2 (9.1)           | 0.686   |
| Hepatotoxic drugs                                    | 0 (0.0)           | 2 (6.7)           | 6 (6.9)           | 1 (4.3)           | 0.348   | 1 (1.8)            | 1 (4.2)           | 6 (7.9)           | 1 (4.5)           | 0.473   |
| Active alcohol intaking                              | 5<br>(11.1)       | 1 (3.3)           | 5 (5.7)           | 2 (8.7)           | 0.554   | 7 (12.7)           | 1 (4.2)           | 5 (6.6)           | 0 (0.0)           | 0.212   |
| Bacterial infection                                  | 17<br>(37.8)      | 18<br>(60.0)      | 42 (48.3)         | 15<br>(65.2)      | 0.106   | 23 (41.8)          | 13<br>(54.2)      | 41 (53.9)         | 11 (50.0)         | 0.55    |
| Variceal bleeding                                    | 7<br>(15.6)       | 0 (0.0)           | 2 (2.3)           | 0 (0.0)           | 0.002   | 7 (12.7)           | 0 (0.0)           | 2 (2.6)           | 0 (0.0)           | 0.018   |
| Portal vein thrombosis                               | 1 (2.2)           | 0 (0.0)           | 2 (2.3)           | 0 (0.0)           | 0.747   | 2 (3.6)            | 0 (0.0)           | 0 (0.0)           | 1 (4.5)           | 0.257   |
| Surgery                                              | 0(0.0)            | 0(0.0)            | 1(0.7)            | 0(0.0)            | 0.767   | 0(0.0)             | 0(0.0)            | 1(2.7)            | 0(0.0)            | 0.093   |

**Table S7. Prevalence of organ failure at diagnosis time point in pre-ACLF patient.**

| <b>Time point</b>          | <b>Day 4</b> | <b>Day 7</b> | <b>Day14</b> | <b>Day21</b> | <b>Day28</b> |
|----------------------------|--------------|--------------|--------------|--------------|--------------|
| New onset pre-ACLF, n      | 28           | 24           | 20           | 12           | 10           |
| Renal failure, n (%)       | 1 (3.6)      | 1 (4.2)      | 2 (10.0)     | 1 (5.3)      | 4 (20.0)     |
| Liver failure, n (%)       | 24 (85.7)    | 23 (86.8)    | 19 (95.0)    | 9 (75.0)     | 6 (80.0)     |
| Coagulation failure, n (%) | 22 (78.6)    | 20 (83.8)    | 18 (90.0%)   | 5 (41.7)     | 7 (80.0)     |
| Brain failure, n (%)       | 0 (0.0)      | 0 (0.0)      | 0 (0.0)      | 1 (8.3)      | 1 (20.0)     |
| Lung failure, n (%)        | 1 (3.6)      | 1 (4.2)      | 1 (5.0)      | 2 (16.7)     | 2 (20.0)     |
| Circulation failure, n (%) | 0 (0.0)      | 2 (8.3)      | 0 (0.0)      | 2 (16.7)     | 2 (13.3)     |

**Table S8. Univariate analysis for ACLF development in HBV-related acutely decompensated cirrhotic patients in the derivation cohort.**

| <b>Variables</b>                                     | <b>HR</b> | <b>95%CI</b> | <b>P value</b> |
|------------------------------------------------------|-----------|--------------|----------------|
| <b>Demographic data</b>                              |           |              |                |
| Sex                                                  | 1.02      | 0.62-1.69    | 0.931          |
| ln (Age)                                             | 0.98      | 0.41-2.38    | 0.968          |
| <b>Acute decompensation</b>                          |           |              |                |
| AD number                                            |           |              |                |
| 1                                                    | 1         | reference    |                |
| 2                                                    | 4.34      | 2.3-6.98     | <0.001         |
| ≥3                                                   | 12.94     | 8.19-23.99   | <0.001         |
| Ascites                                              | 2.01      | 1.19-3.39    | 0.009          |
| <b>Precipitation events</b>                          |           |              |                |
| Hepatitis B flare with HBV reactivation              | 4.51      | 2.7-7.55     | <0.001         |
| Spontaneous hepatitis B flare with high HBV-DNA load | 2.56      | 1.43-4.6     | 0.002          |
| Superimposed infection on HBV                        | 3.20      | 1.48-6.91    | 0.003          |
| Hepatotoxic drugs                                    | 2.17      | 1.05-4.47    | 0.036          |
| Active alcohol intaking                              | 1.20      | 0.49-2.96    | 0.691          |
| Infection                                            | 3.94      | 2.62-5.93    | <0.001         |
| Variceal bleeding                                    | 0.37      | 0.18-0.77    | 0.008          |
| Portal vein thrombosis                               | 0.59      | 0.24-1.44    | 0.244          |
| Surgery                                              | 1.17      | 0.29-4.76    | 0.824          |
| <b>Measurements estimating organ function</b>        |           |              |                |
| ln (TB)                                              | 3.16      | 2.48-4.03    | <0.001         |
| ln (INR)                                             | 83.82     | 38.77-181.22 | <0.001         |
| ln (Cr)                                              | 0.86      | 0.45-1.63    | 0.639          |
| ln (BUN)                                             | 0.94      | 0.61-1.43    | 0.76           |
| ln (Sodium)                                          | 0.00      | 0-0.01       | <0.001         |
| ln (Albumin)                                         | 1.04      | 0.4-2.73     | 0.930          |
| ln (Hemoglobin)                                      | 2.99      | 1.25-7.18    | 0.014          |
| ln (PLT)                                             | 1.15      | 0.84-1.59    | 0.377          |
| <b>Systemic inflammatory parameter</b>               |           |              |                |
| ln (WBC)                                             | 2.66      | 1.87-3.78    | <0.001         |
| ln (neutrophil count)                                | 2.33      | 1.76-3.1     | <0.001         |
| ln (lymphocyte count)                                | 1.04      | 0.74-1.46    | 0.814          |
| ln (NL ratio)                                        | 1.93      | 1.5-2.48     | <0.001         |

Note: The hazard ratios were obtained using the Cox Proportional-Hazards Model.

Abbreviations: HR, hazard ratio; CI, confidence interval; TB, total bilirubin; INR, International normalized ratio; WBC White blood cell count; NL ratio, neutrophil-lymphocyte ratio;

**Table S9. Interaction between bacterial infections and HBV-specific hepatic precipitations in driving ACLF occurrence.**

| Subgroup                                                    | No. of ACLF development / Total | No. of bacterial infection (%) | Unadjusted        |                   | Adjusted         |                   |
|-------------------------------------------------------------|---------------------------------|--------------------------------|-------------------|-------------------|------------------|-------------------|
|                                                             |                                 |                                | HR (95% CI)       | p for interaction | HR (95% CI)      | p for interaction |
| <b>Hepatitis B flare with HBV reactivation</b>              |                                 |                                |                   | 0.529             |                  | 0.763             |
| no                                                          | 76/915                          | 243 (26.6%)                    | 3.36 (2.32-4.87)  |                   | 2.07 (1.40-3.06) |                   |
| yes                                                         | 18/55                           | 19 (34.5%)                     | 4.64 (2.11-10.23) |                   | 2.94 (1.18-7.32) |                   |
| <b>Spontaneous hepatitis B flare with high HBV-DNA load</b> |                                 |                                |                   | 0.070             |                  | 0.188             |
| no                                                          | 81/909                          | 242 (26.6%)                    | 2.96 (2.07-4.25)  |                   | 1.88 (1.28-2.75) |                   |
| yes                                                         | 13/60                           | 20 (33.3%)                     | 8.56 (2.81-26.11) |                   | 4.44 (1.4-14.07) |                   |
| <b>Superimposed infection on HBV</b>                        |                                 |                                |                   | 0.167             |                  | 0.619             |
| no                                                          | 87/943                          | 256 (27.1%)                    | 3.71 (2.62-5.25)  |                   | 2.19 (1.52-3.15) |                   |
| yes                                                         | 7/27                            | 6 (22.2%)                      | 1.21 (0.25-5.82)  |                   | 0.37 (0.04-3.55) |                   |

Statistical analysis was performed by Cox Proportional-Hazards Model.

**Table S10. The competing risk regression for development of ACLF in HBV-related acutely decompensated cirrhotic patients in derivation cohort.**

| <b>Characteristics</b>                               | <b>sHR* (95% CI)</b>   | <b>p value</b> |
|------------------------------------------------------|------------------------|----------------|
| <b>Demographic data</b>                              |                        |                |
| ln (Age)                                             | 2.69 (0.82- 5.80)      | 0.059          |
| <b>Precipitant events</b>                            |                        |                |
| Hepatitis B flare with HBV reactivation              | 2.39 (1.27-4.49)       | 0.007          |
| Spontaneous hepatitis B flare with high HBV-DNA load | 2.03 (1.14-3.62)       | 0.016          |
| Superimposed infection on HBV                        | 3.39 (1.62-7.12)       | 0.001          |
| Hepatotoxic drugs                                    | 1.45 (0.59-3.56)       | 0.420          |
| Bacterial infection                                  | 3.29 (1.29-8.38)       | 0.013          |
| Variceal bleeding                                    | 1.94 (0.79-4.79)       | 0.150          |
| <b>Disease severity parameter</b>                    |                        |                |
| ln (TB)                                              | 2.70 (1.76-4.15)       | <0.001         |
| ln (INR)                                             | 32.37<br>(12.53-83.65) | <0.001         |
| ln (Hemoglobin)                                      | 0.78 (0.19-3.15)       | 0.730          |
| ln (Sodium)                                          | 0.47 (0-238.96)        | 0.630          |
| Ascites                                              | 2.18 (0.80-5.97)       | 0.130          |
| AD number                                            | 0.6 (0.24-1.48)        | 0.260          |
| <b>Systemic inflammatory</b>                         |                        |                |
| ln (WBC)                                             | 0.73 (0.45-1.19)       | 0.210          |
| ln (NL ratio)                                        | 1.64 (1.2-2.25)        | 0.002          |

Note: \*considering liver transplantation as competing risk

Abbreviations: TB, total bilirubin; INR, International normalized ratio; WBC White blood cell count; NL ratio, neutrophil-lymphocyte ratio;



**Table S11. Multivariable logistic regression modeling to predict AD-ACLF progression in the derivation cohort.**

| <b>Multivariable logistic regression modeling</b>    |                 |                   |               |                |
|------------------------------------------------------|-----------------|-------------------|---------------|----------------|
| <b>Predictors</b>                                    | <b>Estimate</b> | <b>Odds Ratio</b> | <b>95% CI</b> | <b>P value</b> |
| Hepatitis B flare with HBV reactivation              | 1.38            | 3.98              | 1.8-8.72      | 0.001          |
| Spontaneous hepatitis B flare with high HBV-DNA load | 0.74            | 2.10              | 0.94-4.50     | 0.062          |
| Superimposed infection on HBV                        | 1.50            | 4.47              | 1.38-13.33    | 0.009          |
| Bacterial infection                                  | 0.91            | 2.49              | 1.46-4.28     | 0.001          |
| ln (TB)                                              | 0.81            | 2.26              | 1.66-3.15     | <0.001         |
| ln (INR)                                             | 4.17            | 64.85             | 19.42-235.70  | <0.001         |
| ln (NL ratio)                                        | 0.63            | 1.87              | 1.28-2.77     | 0.001          |
| Intercept                                            | -7.71           | -                 | -             | <0.001         |

Statistical analysis was performed by a multivariable logistic regression model.

Abbreviations: CI, confidence interval; TB, total bilirubin; INR, International normalized ratio; NL ratio, neutrophil-lymphocyte ratio;

**Table S12. Baseline characteristics during hospitalization and prognosis in HBV-related acutely decompensated cirrhotic patients in derivation cohort and validation cohort**

|                                       | <b>ACLF (n= 111)</b>    | <b>Pre-ACLF (n= 43)</b> | <b>UDC (n= 129)</b>     | <b>SDC (n= 221)</b>     | <b>p</b> |
|---------------------------------------|-------------------------|-------------------------|-------------------------|-------------------------|----------|
| Age (median [IQR])                    | 49.00 [41.00, 55.50]    | 51.00 [46.00, 55.50]    | 53.00 [45.00, 60.00]    | 50.00 [42.00, 58.00]    | 0.11     |
| Male, n (%)                           | 99 (89.2)               | 37 (86.0)               | 87 (67.4)               | 180 (81.4)              | <0.001   |
| Previous decompensation (%)           | 40 (36.0)               | 9 (20.9)                | 72 (55.8)               | 81 (36.7)               | <0.001   |
| Decompensation, n (%)                 |                         |                         |                         |                         |          |
| HE                                    |                         |                         |                         |                         | <0.001   |
| Grade 0                               | 79 (71.2)               | 41 (95.3)               | 118 (91.5)              | 208 (94.1)              |          |
| Grade 1                               | 9 (8.1)                 | 1 (2.3)                 | 7 (5.4)                 | 6 (2.7)                 |          |
| Grade 2                               | 15 (13.5)               | 0 (0.0)                 | 4 (3.1)                 | 7 (3.2)                 |          |
| Grade 3                               | 4 (3.6)                 | 0 (0.0)                 | 0 (0.0)                 | 0 (0.0)                 |          |
| Grade 4                               | 4 (3.6)                 | 1 (2.3)                 | 0 (0.0)                 | 0 (0.0)                 |          |
| Bacterial infection                   | 29 (26.1)               | 13 (30.2)               | 17 (13.2)               | 43 (19.5)               | 0.028    |
| Variceal bleeding                     | 11 (9.9)                | 3 (7.0)                 | 47 (36.4)               | 57 (25.8)               | <0.001   |
| Ascites                               | 73 (65.8)               | 22 (51.2)               | 81 (62.8)               | 125 (56.6)              | 0.22     |
| <b>Laboratory data, median (IQRs)</b> |                         |                         |                         |                         |          |
| TB (mg/dL)                            | 21.76 [15.57, 29.56]    | 21.30 [13.95, 27.70]    | 2.51 [1.12, 8.06]       | 3.22 [1.46, 10.02]      | <0.001   |
| INR                                   | 2.85 [2.27, 3.49]       | 1.82 [1.57, 2.06]       | 1.50 [1.31, 1.80]       | 1.41 [1.25, 1.67]       | <0.001   |
| Cr (mg/dL)                            | 1.00 [0.74, 1.50]       | 0.91 [0.70, 1.03]       | 0.77 [0.67, 0.91]       | 0.77 [0.66, 0.92]       | <0.001   |
| BUN (mEq/L)                           | 6.30 [3.72, 10.79]      | 4.84 [3.40, 6.65]       | 5.34 [4.02, 7.90]       | 4.80 [3.99, 6.90]       | 0.014    |
| ALT (U/L)                             | 122.00 [50.10, 559.50]  | 161.60 [57.75, 367.55]  | 32.20 [20.50, 87.70]    | 52.10 [25.00, 155.00]   | <0.001   |
| AST (U/L)                             | 143.30 [73.15, 328.05]  | 128.50 [78.20, 374.30]  | 47.80 [29.00, 92.30]    | 66.40 [34.00, 169.00]   | <0.001   |
| Hemoglobin (g/L)                      | 113.00 [95.00, 129.50]  | 119.00 [96.50, 132.00]  | 103.50 [80.55, 125.25]  | 115.00 [94.00, 129.00]  | 0.011    |
| WBC (10 <sup>9</sup> /L)              | 6.81 [4.49, 9.40]       | 5.84 [4.57, 7.85]       | 4.09 [3.00, 6.53]       | 4.50 [3.16, 5.95]       | <0.001   |
| PLT (10 <sup>9</sup> /L)              | 80.00 [51.00, 119.00]   | 92.00 [61.00, 119.50]   | 65.50 [41.30, 102.25]   | 76.00 [52.00, 113.00]   | 0.084    |
| NL ratio                              | 4.69 [3.35, 8.59]       | 4.87 [3.04, 7.51]       | 3.17 [2.21, 5.38]       | 2.94 [1.82, 4.58]       | <0.001   |
| Sodium (mEq/L)                        | 136.00 [131.00, 138.85] | 137.30 [133.90, 139.70] | 139.00 [136.00, 141.10] | 138.80 [136.20, 140.60] | <0.001   |
| Albumin (g/L)                         | 30.70 [27.05, 34.15]    | 30.60 [27.50, 34.20]    | 31.00 [27.50, 34.00]    | 31.00 [26.90, 34.50]    | 0.976    |
| Prealbumin, mg/L                      | 36.00 [20.00, 52.00]    | 39.70 [8.82, 56.75]     | 53.35 [15.75, 94.05]    | 45.00 [3.90, 83.00]     | 0.419    |
| C-reaction protein, mg/L              | 10.84 [6.65, 16.61]     | 14.40 [7.76, 19.78]     | 5.90 [1.70, 12.53]      | 7.54 [3.13, 14.05]      | <0.001   |
| Procalcitonin (ng/ml)                 | 0.54 [0.35, 0.97]       | 0.50 [0.22, 0.81]       | 0.16 [0.09, 0.40]       | 0.25 [0.13, 0.60]       | <0.001   |
| <b>HBV parameters</b>                 |                         |                         |                         |                         |          |
| HBV-DNA, log <sub>10</sub> IU/mL      | 2.94 [2.00, 4.17]       | 2.75 [2.00, 5.22]       | 2.39 [2.00, 4.15]       | 2.64 [1.68, 4.14]       | 0.308    |
| Antiviral treatment history, n (%)    |                         |                         |                         |                         | 0.113    |

|                                        |                      |                      |                      |                      |        |
|----------------------------------------|----------------------|----------------------|----------------------|----------------------|--------|
| antiviral naïve                        | 65 (58.6)            | 21 (48.8)            | 53 (41.1)            | 103 (46.6)           |        |
| <6 months                              | 8 (7.2)              | 3 (7.0)              | 12 (9.3)             | 11 (5.0)             |        |
| >6months                               | 38 (34.2)            | 19 (44.2)            | 64 (49.6)            | 107 (48.4)           |        |
| <b>Severity scores, (median [IQR])</b> |                      |                      |                      |                      |        |
| MELD                                   | 31.00 [27.50, 34.00] | 24.00 [21.50, 26.50] | 15.00 [11.00, 21.00] | 15.00 [11.00, 20.00] | <0.001 |
| iMELD                                  | 50.00 [44.50, 56.00] | 44.00 [40.00, 47.50] | 33.00 [27.25, 41.00] | 33.00 [29.00, 39.00] | <0.001 |
| MELD-sodium                            | 32.00 [28.50, 35.00] | 25.00 [23.00, 28.50] | 15.00 [11.00, 23.00] | 16.00 [12.00, 22.00] | <0.001 |
| Child-Pugh                             | 11.00 [10.00, 12.00] | 10.00 [9.00, 11.00]  | 9.00 [8.00, 10.00]   | 9.00 [8.00, 10.00]   | <0.001 |
| CLIF-C AD                              | 61.42 [54.80, 68.39] | 52.86 [48.25, 57.27] | 45.81 [38.97, 51.22] | 43.17 [38.51, 48.05] | <0.001 |
| CLIF-C ACLF                            | 44.23 [40.15, 48.46] | 38.78 [36.28, 43.20] | 32.40 [27.19, 37.89] | 31.62 [28.13, 35.38] | <0.001 |
| CLIF SOFA                              | 8.00 [7.00, 9.00]    | 7.00 [7.00, 7.00]    | 4.50 [3.00, 6.00]    | 5.00 [3.00, 6.00]    | <0.001 |
| CLIF OF                                | 10.00 [10.00, 10.00] | 8.00 [8.00, 9.00]    | 6.00 [6.00, 8.00]    | 7.00 [6.00, 8.00]    | <0.001 |
| <b>Organ failure, n (%)</b>            |                      |                      |                      |                      |        |
| Liver                                  | 92 (82.9)            | 35 (81.4)            | 26 (20.2)            | 46 (20.8)            | <0.001 |
| Coagulation                            | 79 (71.2)            | 1 (2.3)              | 2 (1.6)              | 1 (0.5)              | <0.001 |
| Kidney                                 | 22 (19.8)            | 0 (0.0)              | 0 (0.0)              | 0 (0.0)              | <0.001 |
| Cerebral                               | 8 (7.2)              | 1 (2.3)              | 0 (0.0)              | 0 (0.0)              | <0.001 |
| Circulation                            | 3 (2.7)              | 0 (0.0)              | 0 (0.0)              | 5 (2.3)              | 0.231  |
| Lungs                                  | 2 (1.8)              | 0 (0.0)              | 0 (0.0)              | 0 (0.0)              | 0.068  |
| <b>LT-free mortality (%)</b>           |                      |                      |                      |                      |        |
| 28-day                                 | 28/100 (38.0%)       | 14/41 (34.1%)        | 8/123 (6.5%)         | 0 (0.0)              | <0.001 |
| 90-day                                 | 53/96 (55.2%)        | 23/40 (57.5%)        | 16/116 (13.8%)       | 0 (0.0)              | <0.001 |
| 1-year                                 | 58/94 (61.7%)        | 25/39 (64.1%)        | 25/114 (21.9%)       | 2/220 (0.9%)         | <0.001 |

HE, hepatic encephalopathy; TB, total bilirubin; INR, International normalized ratio; Cr, creatinine; BUN, blood urea nitrogen; ALT alanine aminotransferase; WBC White blood cell count; PLT, platelet count; NL ratio, neutrophil-lymphocyte ratio; MELD, the Model of End-Stage Liver Disease; iMELD, integrated MELD; CLIF OF Chronic Liver Failure-Organ Failure; CLIF-SOFA, Chronic Liver Failure- Sequential Organ Failure Assessment; LT, liver transplantation.

**Table S13. Characteristics and outcomes of patients included in the derivation and validation groups**

| <b>Characteristics</b>                               | <b>Derivation cohort<br/>(n= 970)</b> | <b>Validation cohort<br/>(n= 458)</b> | <b>P value</b> |
|------------------------------------------------------|---------------------------------------|---------------------------------------|----------------|
| Male, n (%)                                          | 771 (79.5)                            | 360 (78.6)                            | 0.754          |
| Age (median [IQR])                                   | 48.88 [42.65, 57.18]                  | 50.50 [43.00, 58.00]                  | 0.091          |
| Previous decompensation, n (%)                       | 383 (39.5)                            | 192 (41.9)                            | 0.413          |
| AD number, n (%)                                     |                                       |                                       | 0.027          |
| 1                                                    | 491 (50.6)                            | 264 (57.6)                            |                |
| 2                                                    | 328 (33.8)                            | 141 (30.8)                            |                |
| ≥3                                                   | 151 (15.6)                            | 53 (11.6)                             |                |
| <b>Decompensation, n (%)</b>                         |                                       |                                       |                |
| HE                                                   |                                       |                                       | 0.088          |
| Grade 0                                              | 926 (95.5)                            | 426 (93.0)                            |                |
| Grade 1                                              | 18 (1.9)                              | 19 (4.1)                              |                |
| Grade 2                                              | 19 (2.0)                              | 11 (2.4)                              |                |
| Grade 3                                              | 6 (0.6)                               | 1 (0.2)                               |                |
| Grade 4                                              | 1 (0.1)                               | 1 (0.2)                               |                |
| Ascites                                              | 676 (69.7)                            | 269 (58.7)                            | <0.001         |
| Bacterial infection                                  | 262 (27.0)                            | 90 (19.7)                             | 0.003          |
| Variceal bleeding                                    | 187 (19.3)                            | 123 (26.9)                            | 0.002          |
| <b>Precipitation events, n (%)</b>                   |                                       |                                       |                |
| Hepatitis B flare with HBV reactivation              | 55 (5.7)                              | 28 (6.1)                              | 0.831          |
| Spontaneous hepatitis B flare with high HBV-DNA load | 61 (6.3)                              | 9 (2.0)                               | 0.001          |
| Superimposed infection on HBV                        | 27 (2.8)                              | 4 (0.9)                               | 0.034          |
| Hepatotoxic drugs                                    | 43 (4.4)                              | 32 (7.0)                              | 0.058          |
| Active alcohol intaking                              | 44 (4.5)                              | 42 (9.2)                              | 0.001          |
| Portal vein thrombosis                               | 83 (8.6)                              | 41 (9.0)                              | 0.883          |
| Surgery                                              | 17 (1.8)                              | 8 (1.7)                               | 1.000          |
| <b>Laboratory data, median (IQRs)</b>                |                                       |                                       |                |
| TB (mg/dL)                                           | 1.38 [0.44, 2.49]                     | 1.18 [0.33, 2.55]                     | 0.381          |
| INR                                                  | 0.42 [0.28, 0.61]                     | 0.41 [0.24, 0.56]                     | 0.015          |
| Cr (mg/dL)                                           | -0.25 [-0.42, -0.08]                  | -0.25 [-0.40, -0.05]                  | 0.470          |
| BUN (mEq/L)                                          | 1.57 [1.30, 1.90]                     | 1.59 [1.36, 1.95]                     | 0.036          |
| ALT (U/L)                                            | 4.06 [3.30, 5.22]                     | 3.77 [3.18, 4.92]                     | 0.001          |
| Hemoglobin (g/L)                                     | 4.72 [4.52, 4.85]                     | 4.73 [4.47, 4.85]                     | 0.694          |
| WBC (10 <sup>9</sup> /L)                             | 1.50 [1.10, 1.86]                     | 1.50 [1.15, 1.87]                     | 0.732          |
| PLT (10 <sup>9</sup> /L)                             | 4.22 [3.85, 4.63]                     | 4.32 [3.88, 4.71]                     | 0.047          |
| HBV-DNA, log <sub>10</sub> IU/ml (median [IQR])      | 4.10 [2.57, 6.02]                     | 2.69 [1.76, 4.37]                     | <0.001         |
| NL ratio                                             | 0.90 [0.47, 1.43]                     | 1.14 [0.73, 1.68]                     | <0.001         |
| Albumin (g/L)                                        | 3.42 [3.28, 3.54]                     | 3.43 [3.30, 3.54]                     | 0.321          |
| Prealbumin, mg/L                                     | 0.30 [0.12, 0.66]                     | 0.23 [0.11, 0.60]                     | 0.098          |
| C-reaction protein, mg/L                             | 8.70 [3.28, 17.60]                    | 7.64 [3.07, 14.74]                    | 0.202          |
| <b>Severity scores, (median [IQR])</b>               |                                       |                                       |                |
| MELD                                                 | 17.00 [12.00, 23.00]                  | 16.00 [11.00, 22.00]                  | 0.003          |
| iMELD                                                | 36.00 [30.00, 42.00]                  | 34.00 [29.00, 41.00]                  | 0.008          |
| MELD-sodium                                          | 19.00 [13.00, 24.00]                  | 17.00 [12.00, 23.25]                  | 0.002          |
| Child-Pugh                                           | 9.00 [8.00, 11.00]                    | 9.00 [8.00, 10.00]                    | 0.008          |

|                              |                      |                      |       |
|------------------------------|----------------------|----------------------|-------|
| CLIF-C AD                    | 44.72 [39.20, 51.61] | 44.97 [39.51, 50.99] | 0.688 |
| CLIF-C ACLF                  | 31.66 [27.30, 37.29] | 32.48 [28.13, 37.74] | 0.151 |
| CLIF SOFA                    | 5.00 [3.00, 7.00]    | 5.00 [3.00, 7.00]    | 0.973 |
| CLIF OF                      | 7.00 [6.00, 8.00]    | 7.00 [6.00, 8.00]    | 0.717 |
| <b>pre-ACLF, n (%)</b>       | 94 (9.7)             | 43 (9.4)             | 0.933 |
| <b>LT-free mortality (%)</b> |                      |                      |       |
| 28-day                       | 49/907 (5.40%)       | 24/435 (5.52%)       | 0.549 |
| 90-day                       | 113/893 (12.65%)     | 41/426 (9.62%)       | 0.226 |
| 1-year                       | 169/881 (19.18%)     | 59/418 (14.11%)      | 0.095 |

Abbreviations: HE, hepatic encephalopathy; TB, total bilirubin; INR, International normalized ratio; Cr, creatinine; BUN, blood urea nitrogen; ALT alanine aminotransferase; WBC White blood cell count; PLT, platelet count; NL ratio, neutrophil-lymphocyte ratio; MELD, the Model of End-Stage Liver Disease; iMELD, integrated MELD; CLIF OF Chronic Liver Failure-Organ Failure; CLIF-SOFA, Chronic Liver Failure- Sequential Organ Failure Assessment; LT, liver transplantation.

**Table S14. The C-index of pre-ACLF prediction model to predict outcomes and readmission in validation cohort.**

|                  | <b>Model</b>           | <b>iMELD</b>           | <b>MELD-sodium</b>  | <b>CLIF-C AD</b>    | <b>Child-Turcotte-Pugh</b> |
|------------------|------------------------|------------------------|---------------------|---------------------|----------------------------|
|                  | C-index<br>(95% CI)    | C-index<br>(95% CI)    | C-index<br>(95% CI) | C-index<br>(95% CI) | C-index<br>(95% CI)        |
| <b>Outcomes</b>  |                        |                        |                     |                     |                            |
| 28-day mortality | 0.763 (0.662-0.864)    | 0.772 (0.669-0.875)    | 0.769 (0.671-0.867) | 0.789 (0.704-0.874) | 0.781 (0.700-0.862)        |
| 90-day mortality | 0.781 (0.709-0.854)    | 0.781 (0.702-0.859)    | 0.764 (0.683-0.846) | 0.773 (0.703-0.843) | 0.718 (0.646-0.790)        |
| 1-year mortality | 0.702<br>(0.627-0.777) | 0.722<br>(0.647-0.798) | 0.694 (0.614-0.774) | 0.717 (0.646-0.789) | 0.653 (0.580-0.722)        |
| Readmission      | 0.543 (0.496-0.589)    | 0.536 (0.473-0.599)    | 0.521 (0.458-0.583) | 0.569 (0.508-0.630) | 0.505 (0.455-0.565)        |

Annotation: prediction of outcomes including 28-day,90-day and 1-year liver transplantation mortality was analysed by cox regression; prediction of readmission was analysed by logistic regression.

**Fig. S1. Pattern of missing data of the continuous variables analyzed in the derivation cohort.**

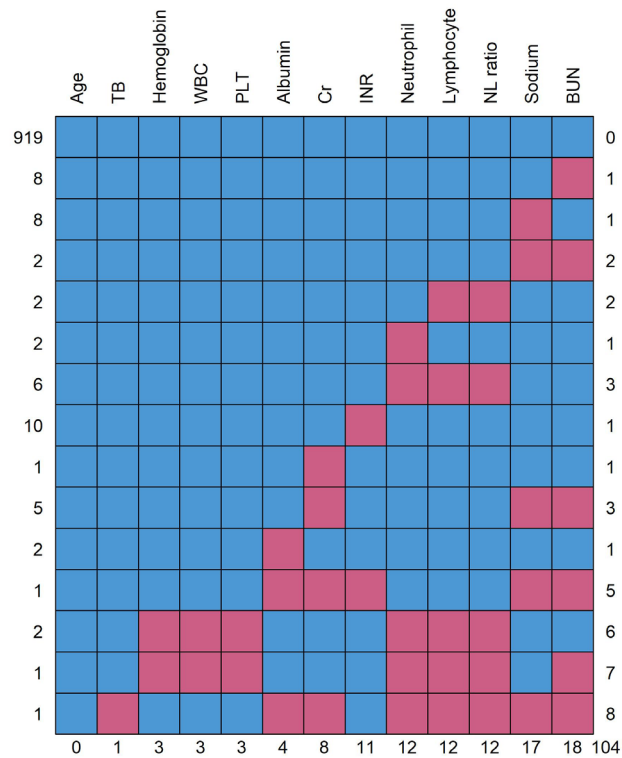

**Figure legend: Pattern of missing data of the continuous variables analyzed in the derivation cohort.** The red square means data missing and the blue square means data complete. The figure shows the overall number of missing data for each variable and the distribution of different missing types. Taking the “BUN” in the rightmost column as an example, a total of 18 patients has missing data of BUN, of which 11 patients (line 2) have missing data of BUN alone, 2 patient (line 4) has missing data of BUN and sodium, 3 patients (line 10) have missing data of creatinine, sodium and BUN.

**Fig. S2. Kaplan–Meier analysis of liver transplantation (LT)-free survival rates in patients with ACLF, pre-ACLF, unstable decompensated cirrhosis (UDC) and stable decompensated cirrhosis (SDC).**

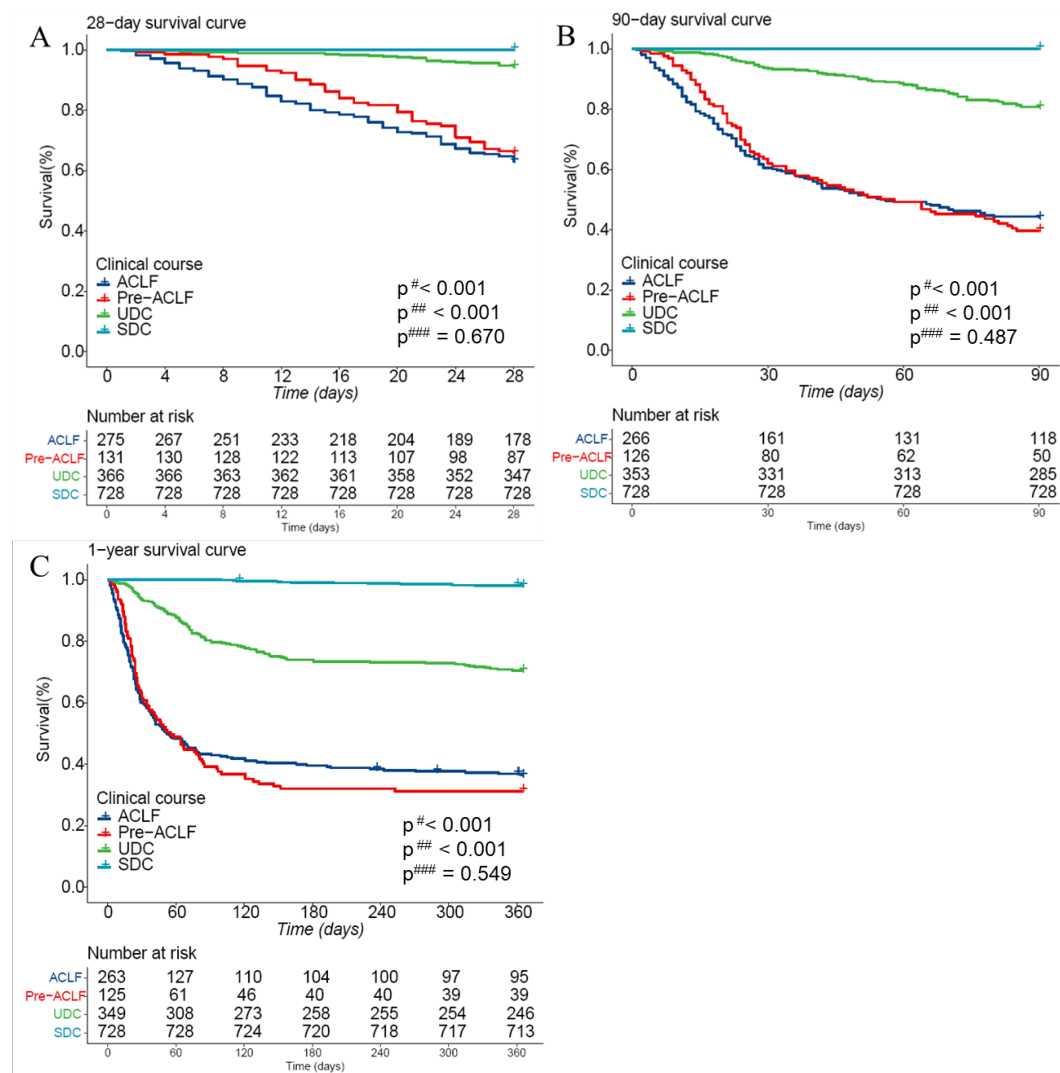

Annotation:  $p^{\#}$  denotes  $p$  value for comparisons between UDC and SDC group patients;  $p^{\#\#}$  denotes  $p$  value for comparisons between UDC and pre-ACLF patients;  $p^{\#\#\#}$  denotes  $p$  value for comparisons between ACLF and pre-ACLF.



**Fig. S3. Cumulative number of pre-ACLF at 4, 7, 14, 21, 28 days during hospitalization in the derivation cohort. (A) Fitting curve (red line) of cumulative number; (B) Bar plot of cumulative number.**

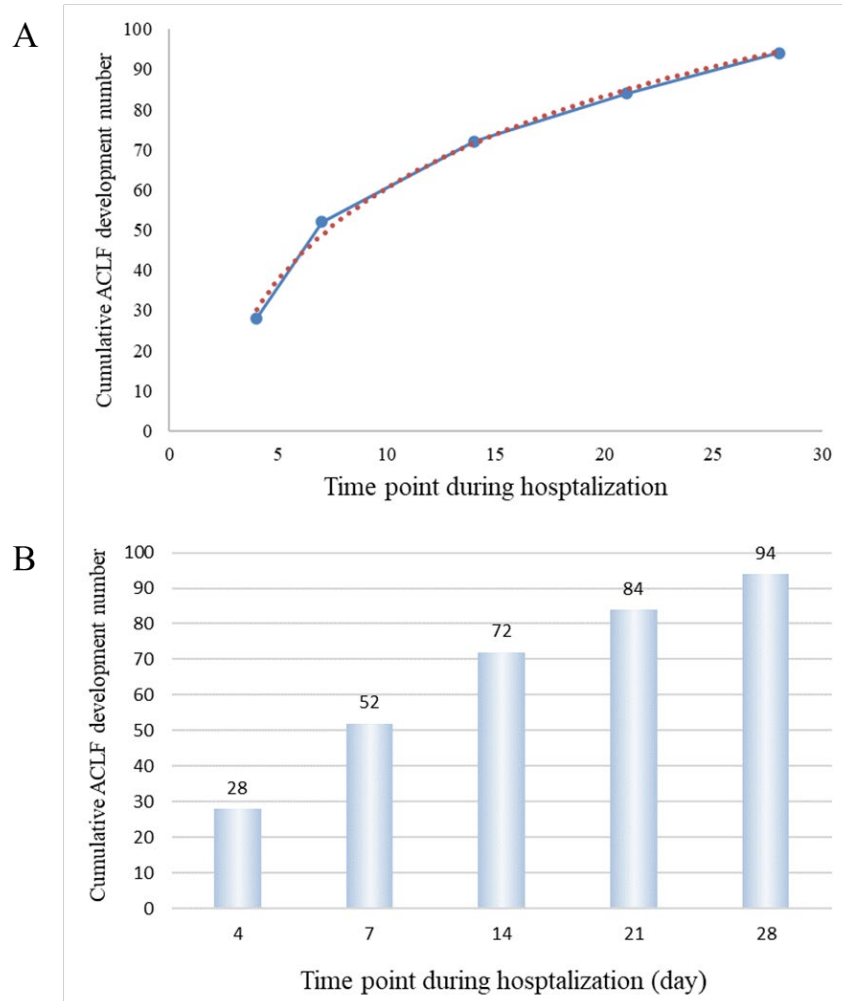

**Fig. S4. Association of HBV-DNA load level on admission and ACLF development in patients with hepatitis flare.**

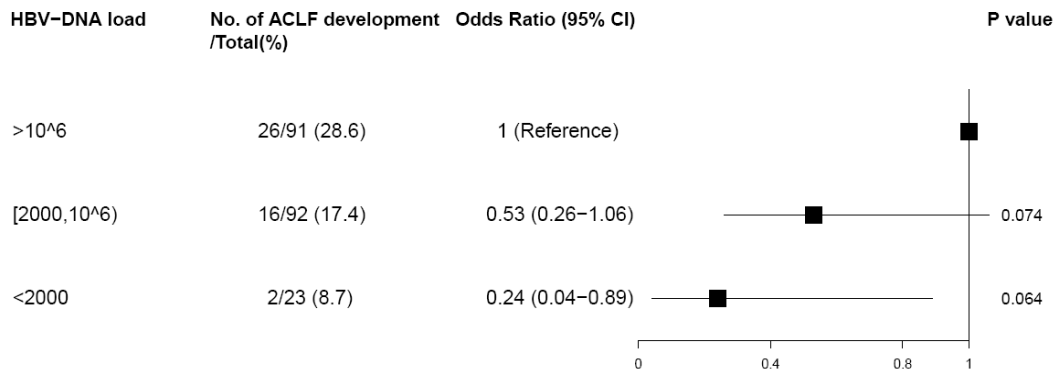

**Fig. S5. Relative importance of predictors in the derivation model.** (A) The deviance of predictors measured by Wald  $\chi^2$  minus the predictor degrees of freedom; (B) The percentage of relative contribution to the variance of the model.

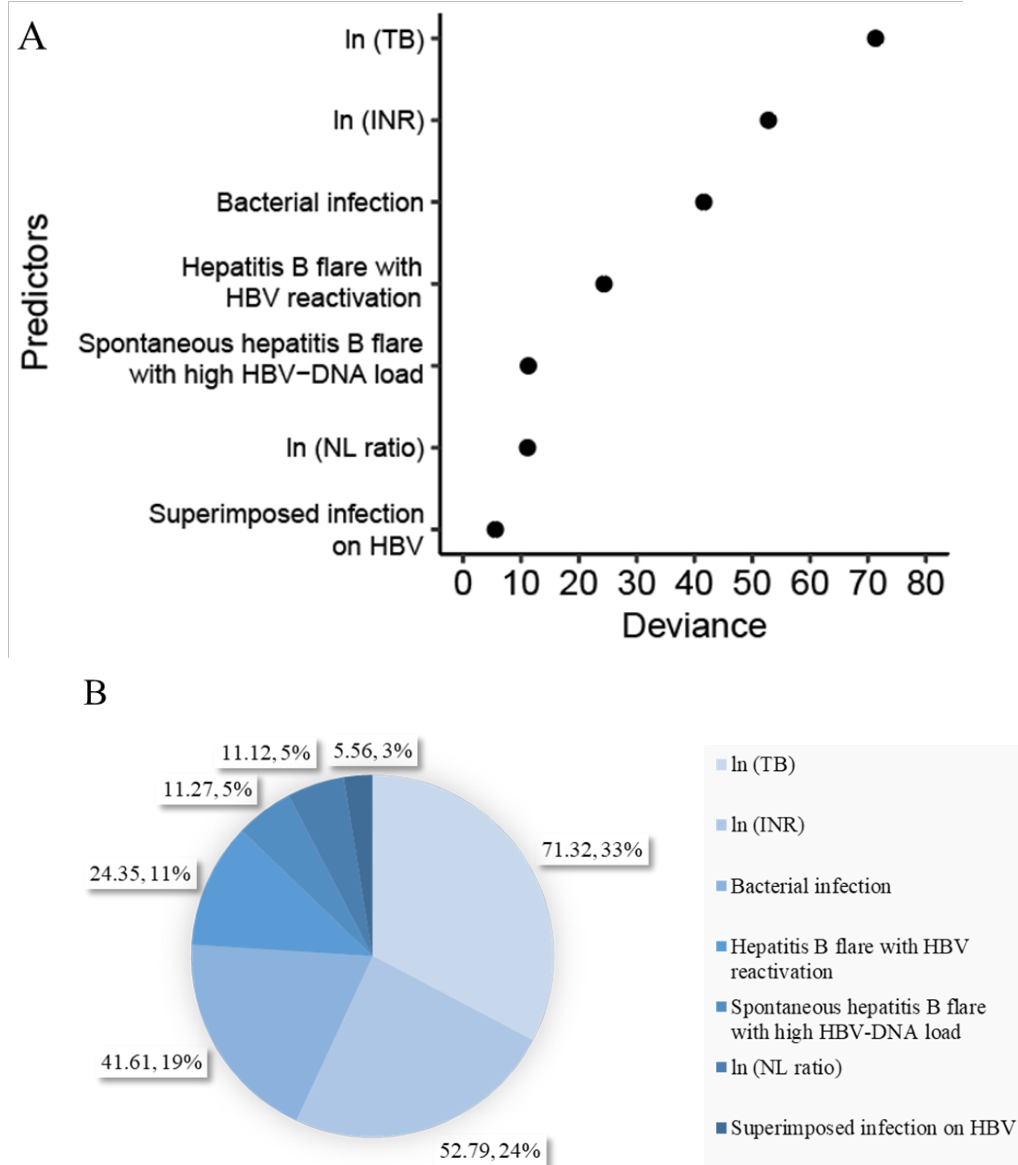

## Supplementary references

1. Moreau R, Jalan R, Gines P, Pavesi M, Angeli P, Cordoba J, et al. **Acute-on-chronic liver failure is a distinct syndrome that develops in patients with acute decompensation of cirrhosis.** *Gastroenterology* 2013; 144(7):1426-1437, 1437 e1421-1429.
2. Moore KP, Wong F, Gines P, Bernardi M, Ochs A, Salerno F, et al. **The management of ascites in cirrhosis: report on the consensus conference of the International Ascites Club.** *Hepatology* 2003; 38(1):258-266.
3. Gu WY, Xu BY, Zheng X, Chen J, Wang XB, Huang Y, et al. **Acute-on-Chronic Liver Failure in China: Rationale for Developing a Patient Registry and Baseline Characteristics.** *Am J Epidemiol* 2018; 187(9):1829-1839.
4. Qiao L, Wang X, Deng G, Huang Y, Chen J, Meng Z, et al. **Cohort profile: a multicentre prospective validation cohort of the Chinese Acute-on-Chronic Liver Failure (CATCH-LIFE) study.** *BMJ Open* 2021; 11(1):e037793.
5. Chen YY, Li H, Xu BY, Zheng X, Li BL, Wang XB, et al. **Plasma Exchange-Based Non-bioartificial Liver Support System Improves the Short-Term Outcomes of Patients With Hepatitis B Virus-Associated Acute-on-Chronic Liver Failure: A Multicenter Prospective Cohort Study.** *Front Med (Lausanne)* 2021; 8:779744.
6. Huang J, Wang H, Fan ST, Zhao B, Zhang Z, Hao L, et al. **The national program for deceased organ donation in China.** *Transplantation* 2013; 96(1):5-9.
7. Wahid NA, Rosenblatt R, Brown RS, Jr. **A Review of the Current State of Liver Transplantation Disparities.** *Liver transplantation : official publication of the American Association for the Study of Liver Diseases and the International Liver Transplantation Society* 2021; 27(3):434-443.
